# Supplementary material
Source: ML conference proceedings conference paper supplement (https://openreview.net/forum?id=zGoCaP7NyR)
Supplement: supplementary_material [file attachment]

# Supplementary Materials for MMAL: Multi-Modal Analytic Learning for Exemplar-Free Audio-Visual Class Incremental Tasks

Anonymous Authors

## 1 PROOF OF THEOREM 1

At step  $k-1$ , we have

$$\hat{W}_{k-1}^{av} = ((X_{0:k-1}^{av})^T X_{0:k-1}^{av} + \eta I)^{-1} (X_{0:k-1}^{av})^T Y_{0:k-1}^{train}, \quad (1)$$

Hence, at step  $k$  we have

$$\hat{W}_k^{av} = ((X_{0:k}^{av})^T X_{0:k}^{av} + \eta I)^{-1} (X_{0:k}^{av})^T Y_{0:k}^{train}, \quad (2)$$

In the paper, we let

$$R_{k-1}^{av} = ((X_{0:k-1}^{av})^T X_{0:k-1}^{av} + \eta I)^{-1}, \quad (3)$$

To facilitate subsequent calculations, here we let,

$$Q_{k-1}^{av} = (X_{0:k-1}^{av})^T Y_{0:k-1}^{train}, \quad (4)$$

Thus we can rewrite (1) as

$$\hat{W}_{k-1}^{av} = R_{k-1}^{av} Q_{k-1}^{av}, \quad (5)$$

Therefore, at step  $k$  we have

$$\hat{W}_k^{av} = R_k^{av} Q_k^{av}, \quad (6)$$

From (3), we can recursively calculate  $R_k^{av}$  from  $R_{k-1}^{av}$ , i.e.,

$$R_k^{av} = ((R_{k-1}^{av})^{-1} + (X_k^{av})^T X_k^{av})^{-1}, \quad (7)$$

According to the Woodbury matrix identity, we have

$$(A + UCV)^{-1} = A^{-1} - A^{-1}U(VA^{-1}U + C^{-1})VA^{-1}, \quad (8)$$

Let  $A = (R_{k-1}^{av})^{-1}$ ,  $U = (X_k^{av})^T$ ,  $C = I$ ,  $V = X_k^{av}$ , in (7), we have

$$R_k^{av} = R_{k-1}^{av} - R_{k-1}^{av} (X_k^{av})^T (X_k^{av} R_{k-1}^{av} (X_k^{av})^T + I)^{-1} X_k^{av} R_{k-1}^{av}, \quad (9)$$

Hence,  $R_k^{av}$  can be recursively updated using its last-step counterpart  $R_{k-1}^{av}$  and data from the current step (i.e.,  $X_k^{av}$ ). This proves the recursive calculation of  $R_k^{av}$ .

Next, we derive the recursive calculation of  $\hat{W}_k^{av}$ . To this end, we first recursively calculate  $Q_k^{av}$ , i.e.,

$$Q_k^{av} = (X_{0:k}^{av})^T Y_{0:k}^{train} = Q_{k-1}^{av} + (X_k^{av})^T Y_k^{train} \quad (10)$$

Let  $K_k = (X_k^{av} R_{k-1}^{av} (X_k^{av})^T + I)^{-1}$ . Since

$$I = K_k K_k^{-1} = K_k (X_k^{av} R_{k-1}^{av} (X_k^{av})^T + I) \quad (11)$$

we have  $K_k = I - K_k X_k^{av} R_{k-1}^{av} (X_k^{av})^T$ . Therefore,

$$\begin{aligned} & R_{k-1}^{av} (X_k^{av})^T (X_k^{av} R_{k-1}^{av} (X_k^{av})^T + I)^{-1} \\ &= R_{k-1}^{av} (X_k^{av})^T K_k \\ &= R_{k-1}^{av} (X_k^{av})^T (I - K_k X_k^{av} R_{k-1}^{av} (X_k^{av})^T) \\ &= (R_{k-1}^{av} - R_{k-1}^{av} (X_k^{av})^T K_k X_k^{av} R_{k-1}^{av}) (X_k^{av})^T \\ &= R_k^{av} (X_k^{av})^T, \end{aligned} \quad (12)$$

Hence,  $\hat{W}_k^{av}$  can be rewritten as

$$\begin{aligned} \hat{W}_k^{av} &= R_k^{av} Q_k^{av} \\ &= R_k^{av} (Q_{k-1}^{av} + (X_k^{av})^T Y_k^{train}) \\ &= R_k^{av} Q_{k-1}^{av} + R_k^{av} (X_k^{av})^T Y_k^{train}, \end{aligned} \quad (13)$$

By substituting (9) into  $R_k^{av} Q_{k-1}^{av}$ , we have

$$\begin{aligned} R_k^{av} Q_{k-1}^{av} &= R_{k-1}^{av} Q_{k-1}^{av} \\ &\quad - R_{k-1}^{av} (X_k^{av})^T (X_k^{av} R_{k-1}^{av} (X_k^{av})^T + I)^{-1} X_k^{av} R_{k-1}^{av} Q_{k-1}^{av} \\ &= \hat{W}_{k-1}^{av} - R_{k-1}^{av} (X_k^{av})^T (X_k^{av} R_{k-1}^{av} (X_k^{av})^T + I)^{-1} X_k^{av} \hat{W}_{k-1}^{av}, \end{aligned} \quad (14)$$

According to (12), (14) can be rewritten as

$$R_k^{av} Q_{k-1}^{av} = \hat{W}_{k-1}^{av} - R_k^{av} (X_k^{av})^T X_k^{av} \hat{W}_{k-1}^{av}, \quad (15)$$

By inserting (15) into (13), we have

$$\hat{W}_k^{av} = \hat{W}_{k-1}^{av} - R_k^{av} (X_k^{av})^T X_k^{av} \hat{W}_{k-1}^{av} + R_k^{av} (X_k^{av})^T Y_k^{train},$$

which proves the recursive calculation of  $\hat{W}_k^{av}$ .

## 2 PARAMETER STUDIES

In this section, we explore the impact of different settings of  $\lambda_a$  and  $\lambda_v$ . Our experimental results, which can be found in Table 1, 2 and 3 for AVE, Kinetics-Sounds, and VGGSound100 datasets respectively, demonstrate the effects of different settings of  $\lambda_a$  and  $\lambda_v$  on the performance of the model.

Table 1: Parameter studies on the AVE dataset.

| $\lambda_a$ | $\lambda_v$ | Accuracy |        |        |        | Mean Acc. |
|-------------|-------------|----------|--------|--------|--------|-----------|
|             |             | step 1   | step 2 | step 3 | step 4 |           |
| 0.1         | 1.0         | 79.81    | 73.33  | 73.97  | 70.56  | 74.42     |
| 0.3         | 1.0         | 79.81    | 74.76  | 75.56  | 72.08  | 75.55     |
| 0.5         | 1.0         | 79.81    | 75.71  | 76.19  | 72.33  | 76.01     |
| 0.8         | 1.0         | 80.77    | 76.19  | 76.20  | 71.57  | 76.18     |
| 1.0         | 1.0         | 79.81    | 76.67  | 76.68  | 71.21  | 76.09     |
| 0.8         | 0.9         | 80.77    | 77.14  | 76.83  | 72.08  | 76.71     |
| 0.8         | 0.7         | 80.77    | 76.19  | 74.60  | 71.07  | 75.66     |
| 0.8         | 0.5         | 81.73    | 75.71  | 73.33  | 70.30  | 75.27     |
| 0.8         | 0.3         | 81.73    | 74.76  | 72.38  | 69.03  | 74.48     |
| 0.8         | 0.1         | 81.73    | 73.81  | 71.43  | 68.53  | 73.88     |

Table 2: Parameter studies on the Kinetics-Sounds dataset.

| $\lambda_a$ | $\lambda_v$ | Accuracy |        |        |        |        | Mean Acc. |
|-------------|-------------|----------|--------|--------|--------|--------|-----------|
|             |             | step 1   | step 2 | step 3 | step 4 | step 5 |           |
| 0.1         | 1.0         | 94.89    | 82.73  | 75.65  | 69.71  | 67.57  | 78.11     |
| 0.3         | 1.0         | 95.16    | 83.38  | 76.08  | 70.36  | 68.33  | 78.66     |
| 0.5         | 1.0         | 95.70    | 82.73  | 76.17  | 71.00  | 69.31  | 78.98     |
| 0.8         | 1.0         | 95.43    | 82.34  | 75.65  | 71.07  | 69.20  | 78.73     |
| 1.0         | 1.0         | 95.69    | 81.82  | 75.48  | 70.61  | 68.54  | 78.42     |
| 0.5         | 0.9         | 95.69    | 82.33  | 76.08  | 70.61  | 69.00  | 78.74     |
| 0.5         | 0.8         | 95.43    | 81.95  | 75.56  | 70.61  | 68.84  | 78.48     |
| 0.5         | 0.5         | 94.89    | 81.43  | 75.22  | 69.51  | 66.60  | 77.53     |
| 0.5         | 0.3         | 95.16    | 80.00  | 73.48  | 68.28  | 65.42  | 76.47     |
| 0.5         | 0.1         | 94.89    | 78.44  | 71.23  | 65.95  | 62.97  | 74.69     |

Table 3: Parameter studies on the VGGSound100 dataset.

| $\lambda_a$ | $\lambda_v$ | Accuracy |        |        |        |        |        |        |        |        |         | Mean Acc. |
|-------------|-------------|----------|--------|--------|--------|--------|--------|--------|--------|--------|---------|-----------|
|             |             | step 1   | step 2 | step 3 | step 4 | step 5 | step 6 | step 7 | step 8 | step 9 | step 10 |           |
| 0.1         | 1.0         | 89.80    | 86.90  | 84.53  | 79.05  | 75.52  | 70.80  | 68.28  | 65.75  | 63.78  | 63.14   | 74.75     |
| 0.3         | 1.0         | 89.80    | 86.80  | 85.60  | 79.85  | 76.60  | 71.53  | 69.03  | 66.70  | 64.64  | 63.88   | 75.44     |
| 0.5         | 1.0         | 90.20    | 87.10  | 85.87  | 80.45  | 77.36  | 72.07  | 69.71  | 67.20  | 65.18  | 64.44   | 75.96     |
| 0.7         | 1.0         | 90.40    | 87.30  | 85.80  | 80.55  | 77.68  | 72.30  | 69.80  | 67.67  | 65.69  | 64.66   | 76.19     |
| 1.0         | 1.0         | 90.40    | 87.40  | 85.80  | 80.40  | 77.72  | 72.20  | 69.68  | 67.68  | 65.51  | 64.60   | 76.13     |
| 0.5         | 0.9         | 90.40    | 87.30  | 85.67  | 80.20  | 77.60  | 72.20  | 69.88  | 67.35  | 65.40  | 64.54   | 76.05     |
| 0.5         | 0.8         | 90.20    | 87.10  | 85.33  | 79.85  | 77.64  | 72.17  | 69.83  | 67.25  | 65.56  | 64.60   | 75.95     |
| 0.5         | 0.5         | 90.40    | 87.30  | 84.60  | 79.25  | 77.12  | 72.00  | 69.48  | 67.10  | 65.29  | 64.28   | 75.68     |
| 0.5         | 0.3         | 90.60    | 87.00  | 84.53  | 79.05  | 76.48  | 71.53  | 69.34  | 66.90  | 64.64  | 63.88   | 75.39     |
| 0.5         | 0.1         | 90.60    | 86.50  | 84.13  | 78.65  | 75.72  | 70.93  | 68.57  | 65.77  | 63.73  | 62.96   | 74.76     |
